# Supplementary material
Source: publisher figshare collection journal article supplement (https://acs.figshare.com/ndownloader/files/4543531)

## Supplementary Material

### SupplementaryTable 1

#### Database search result of 2D-SW spot “a” in HEK293 nuclear extract

| Name       | ID        | MW    | pI   | Sequence coverage | Entries matched | Score |
|------------|-----------|-------|------|-------------------|-----------------|-------|
| C/EBP beta | NP_005185 | 36106 | 8.55 | 9%                | 2               | 40    |
| hnRNP A1   | P09651    | 38822 | 9.26 | 12%               | 2               | 122   |
| PA2G2      | Q9UQ80    | 43759 | 6.13 | 17%               | 4               | 134   |

Except keratin, there are other two candidate proteins identified along with C/EBP beta, which are heterogeneous nuclear ribonucleoprotein A1 (hnRNP A1) and proliferation associated protein 2G4 (PA2G4). hnRNP A1 is a highly abundant protein involved in post-transcriptional gene expression processes including mRNA and rRNA processing, RNA export, and RNA stability. It can interact with ssDNA and RNA. As its MW and pI is so close to C/EBP, so we speculate that it is contaminated in our sample. Another candidate protein is PA2G4 with MW of 43787Da and pI 6.13. It is a RNA binding protein involved in growth regulation and also a transcriptional co-repressor of androgen receptor-regulated genes and other cell cycle regulatory genes through its interactions with histone deacetylases. Until now, it is not shown that PA2G4 is associated with EP24 oligonucleotide binding.

## Supplementary Figure Legends

### Figure 1

A, The Enhanced-GFP and C/EBP alpha sequences are shown in Bold and Bold underlined, respectively, in the chimeric fusion protein GFP-C/EBP. B, EMSA competition assay. Bacterial crude extract (1  $\mu$ g) containing GFP-C/EBP was mixed with 1.5 nM radiolabeled C/EBP oligonucleotide (EP24) in the absence (no competitor, NC) or presence of 100 molar excess of unlabeled C/EBP (CEBP) or irrelevant AP1 oligonucleotide (AP1). The positions of the specific C/EBP complex (C) and the unbound DNA (U) are shown to the right. C, The purified GFP-C/EBP (pure) and the bacterial crude extract (crude), were separated by 12% SDS-PAGE gel and stained with coomassie brilliant blue. D, Comparison of Southwestern blot and Western blot analysis of purified GFP-C/EBP. A serial dilution of purified GFP-C/EBP was simultaneously analyzed by western blot (WB) using C/EBP antibody and Southwestern blotting (SW) analysis using radiolabeled C/EBP oligonucleotide (EP24).

### Figure 2

MS/MS spectra of precursor peptides shown in Figure 2A. The precursor ions including 444.2 (2+), 606.6 (2+), 999.6 (1+) and 1566.6 (1+) were analyzed by HPLC-ESI-MS/MS. A series of b- and y-product ions are indicated in the spectra. The amino acid sequence of the precursor peptide is shown on the top of each spectrum.

### Figure 3

(A) MS/MS spectra of a typical peptide VLELTSDNDR (m/z 581.10, 2+) from 2D-SW blot of purified GFP-C/EBP. (B, C) two peptides, TIFFK (m/z 655.22, 1+) and FSVSGEGEGDATY GK (752.16, 2+) from 2D-SW blot of bacterial crude extract GFP-

C/EBP. (D) MS/MS spectra of triply charged peptide APPTACYAGAAPSQVKSK at  $m/z$  639.18 (2+) from 2D-SW blot of HEK293 nuclear extract. A series of b- and y-fragment ions are indicated in the spectra. The amino acid sequence of the precursor peptide is shown on the top of each spectrum.

# Supplementary Figure 1

A

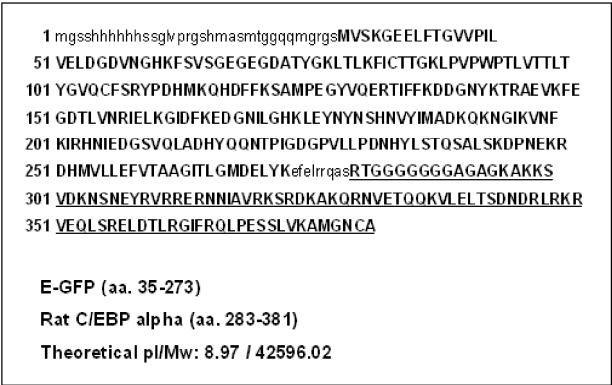

B

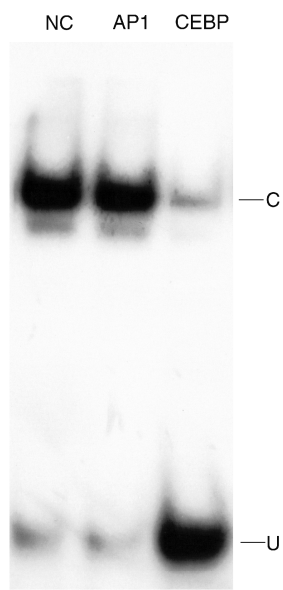

C

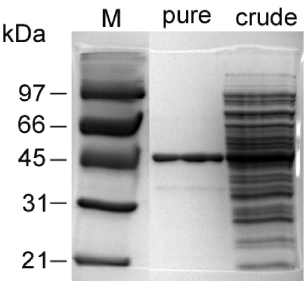

D

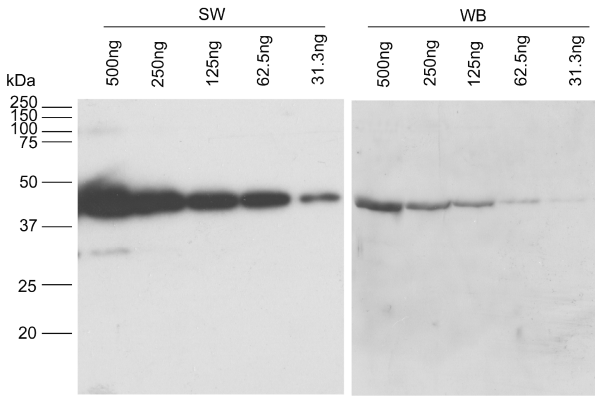

## Supplementary Figure 2

**A**

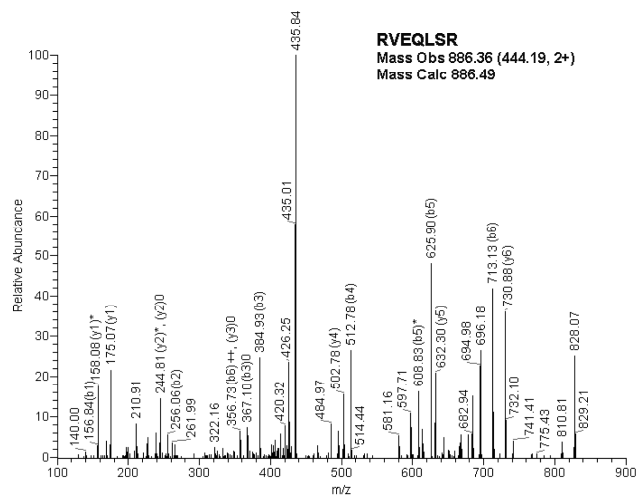

**B**

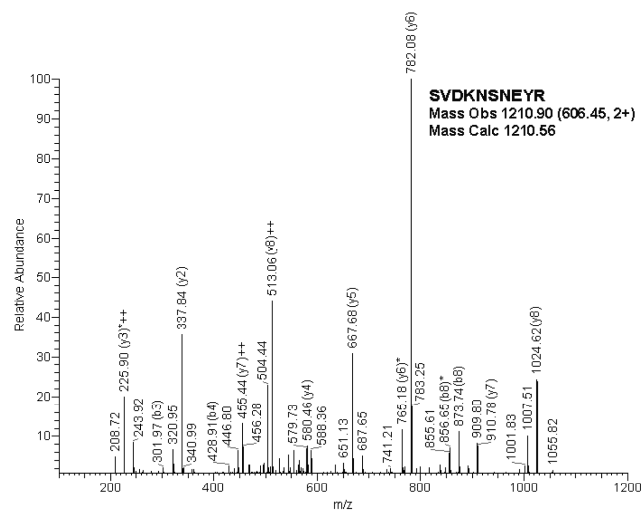

**C**

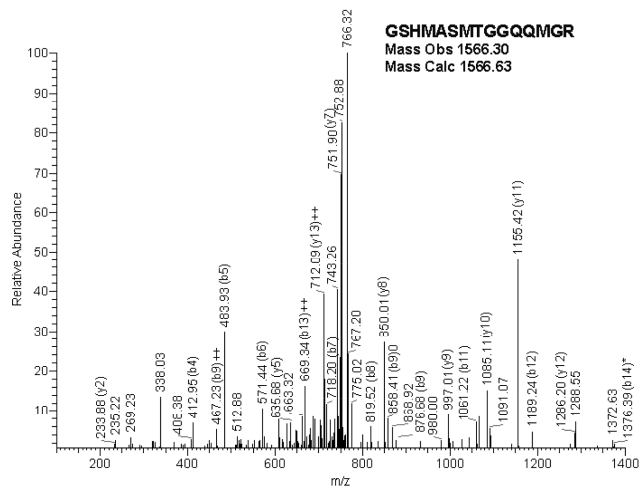

**D**

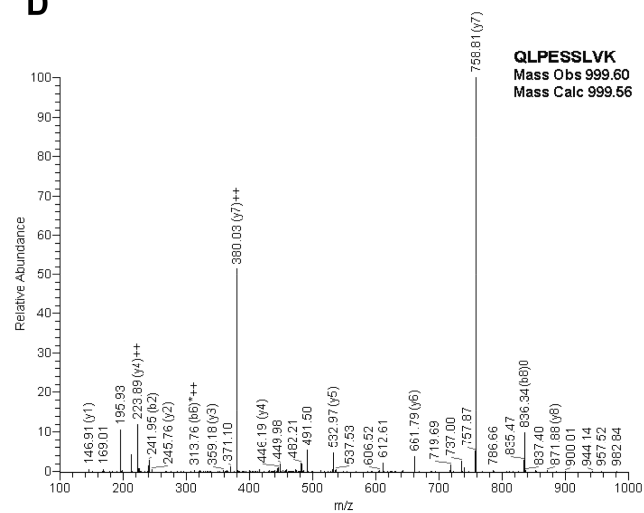

# Supplementary Figure 3

A

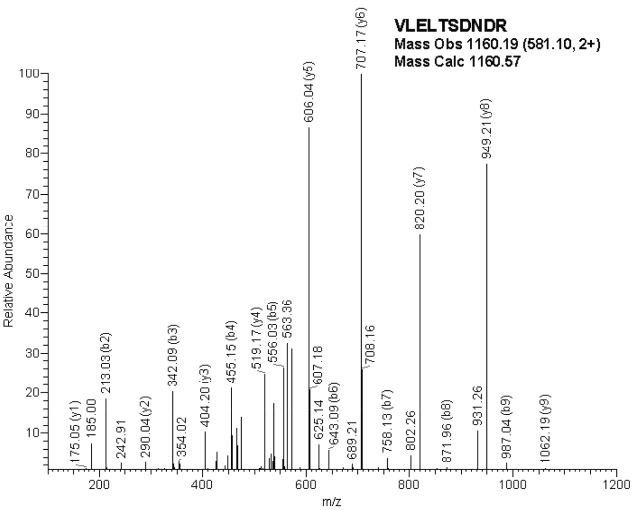

B

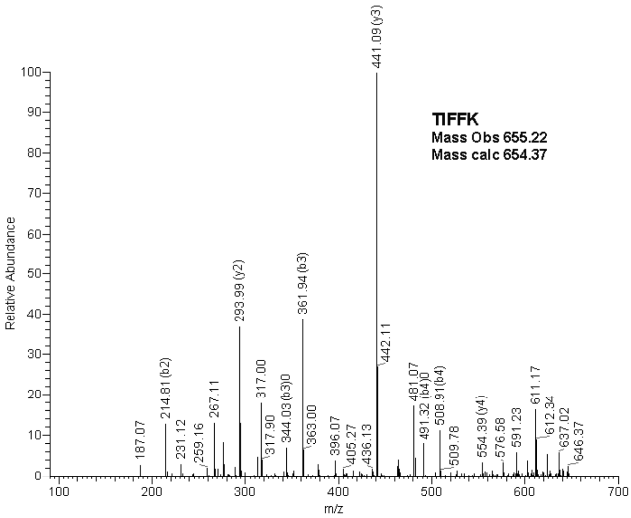

C

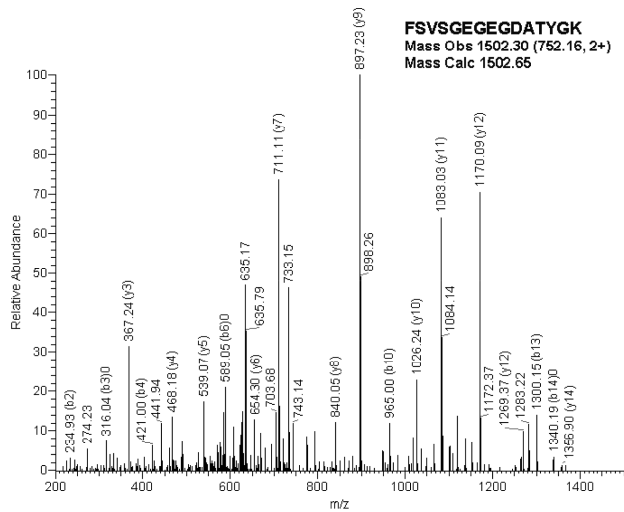

D

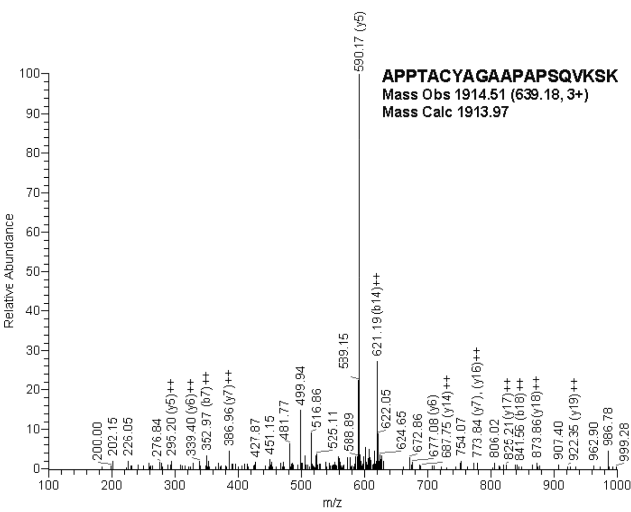

Supplement: Supplementary file 1 [file 4543531]
